# Supplementary material for: Gamma-Irradiated Non-Capsule Group B Streptococcus Promotes T-Cell Dependent Immunity and Provides a Cross-Protective Reaction
Source: MDPI journal article supplement (doi:10.3390/ph16020321), 2023-02-20
Supplement: s1 [file s1]

# Gamma-irradiated Non-Capsule Group B Streptococcus Promotes the T-cell dependent Immunity and confers a Cross protection

Yong Zhi<sup>1</sup>, Fengjia Chen<sup>2</sup>, Guangxu Cao<sup>1</sup>, Fang Li<sup>1</sup>

1. Department of Obstetrics and Gynecology, Shanghai East Hospital, School of Medicine, Tongji University, Shanghai, 200092, China

2. Research Division for Radiation Science, Korea Atomic Energy Research Institute, Jeongseup 56212, Jeollabuk-do, Republic of Korea

## Supplementary Material

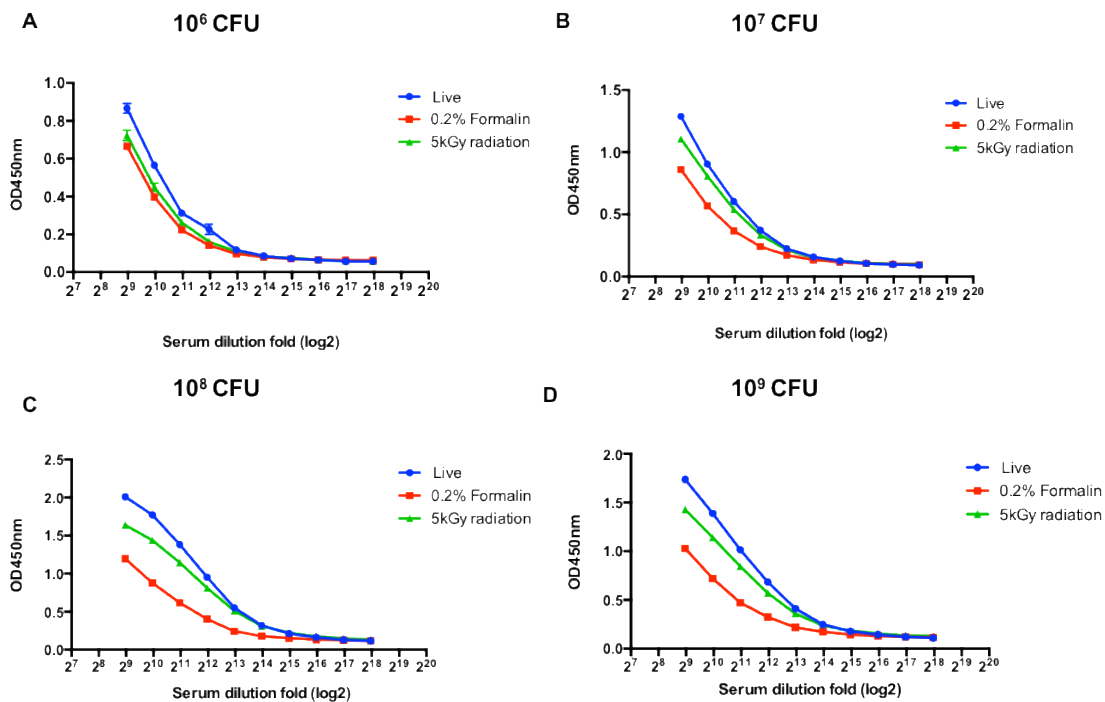

## Supplementary Figure 1. Rad-GBS showed higher adsorption in comparison with Che-GBS.

The constant numbers of inactivated GBS (A) 10<sup>6</sup> CFU/well (B) 10<sup>7</sup> CFU/well, (C) 10<sup>8</sup> CFU/well or (D) 10<sup>9</sup> CFU/well were coated on immunoplate, anti- GBS serum were directly added and serially diluted, after incubation for 45 min at room temperature. The optical density absorbance at (OD<sub>450</sub>)

are measured and representative of three independent experiments and are presented as the mean  $\pm$  standard deviation.

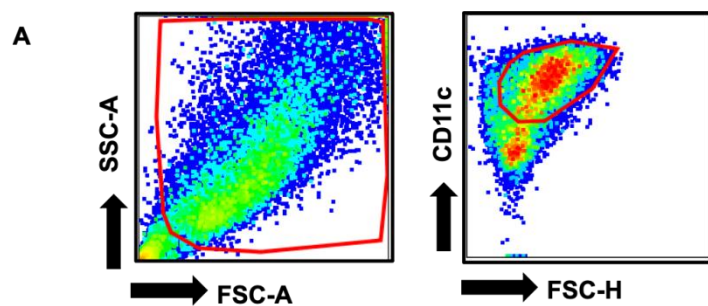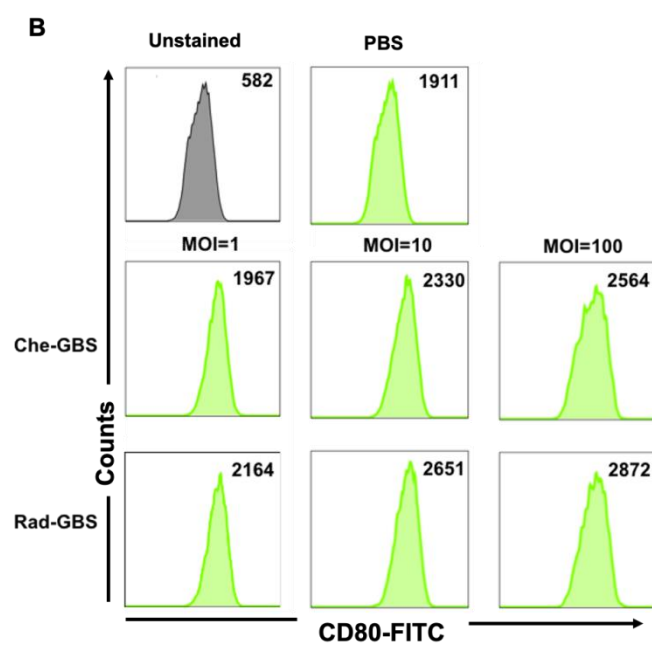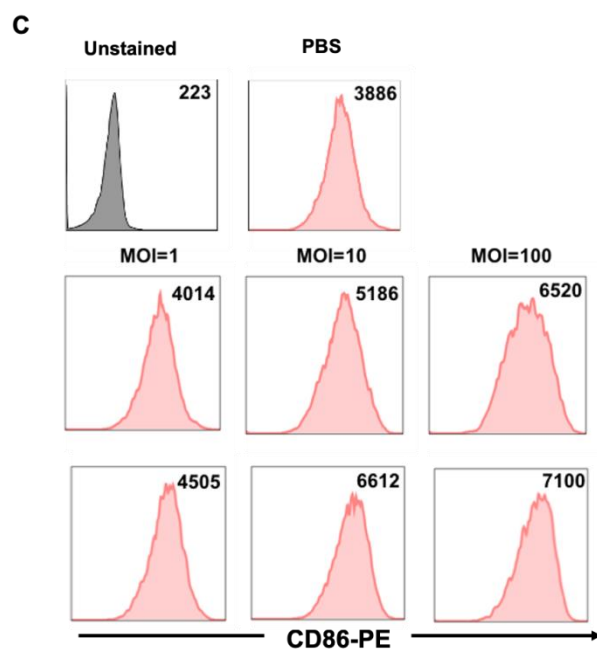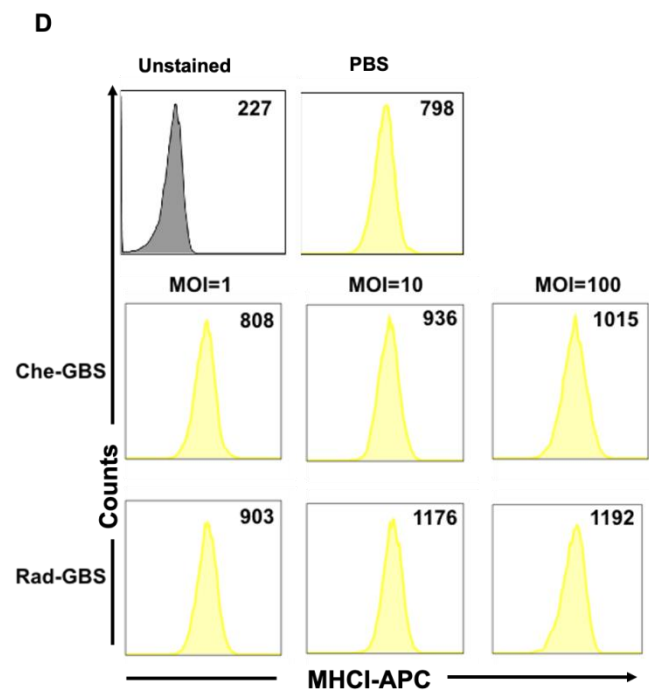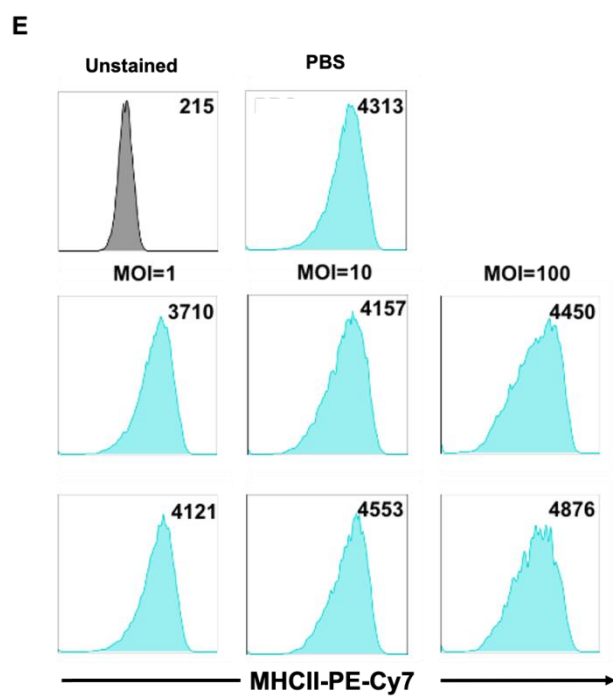

**Supplementary Figure 2. Rad-GBS modestly induces activation of BM-DCs in comparison with Che-GBS.** Bone marrow-dendritic cells (BM-DCs) ( $2 \times 10^6$  cells/mL) were isolated and incubated with GM-CSF, followed by stimulation with either Rad-GBS or Che-GBS at  $10^6$ ,  $10^7$ , and  $10^8$  CFU/well for 24h. The expression of the co-stimulatory markers CD80 and CD86, major histocompatibility complex MHC I and MHC II was analyzed by flow cytometry.

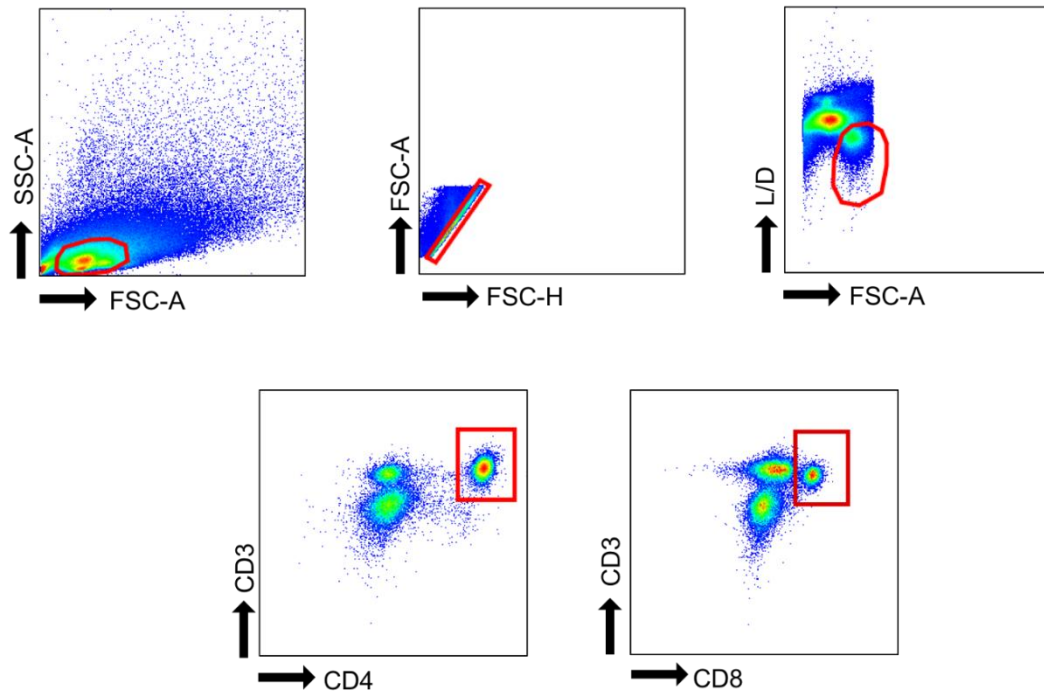

**Supplementary Figure 3. Flow cytometric analysis of functional CD4<sup>+</sup> and CD8<sup>+</sup> T cells in mice immunized with Rad-GBS or Che-GBS.** Mice (n=5) were immunized with various dosages of Rad-GBS or Che-GBS as scheduled, and mice injected with alum were only used as the control

group. Functional T cells were classified and gated according to the expression of CD4<sup>+</sup> or CD8<sup>+</sup> on the cell surface.
